# Supplementary material for: Early recovery of proteasome activity in cells pulse-treated with proteasome inhibitors is independent of DDI2
Source: eLife. 2024 Apr 15;12:RP91678. doi: 10.7554/eLife.91678 (PMC11018354; doi:10.7554/eLife.91678)
Supplement: Figure 1—figure supplement 1—source data 1. [file elife-91678-fig1-figsupp1-data1.xlsx]

## Sheet: FigS1_source
	HAP1 wt	HAP1 wt	HAP1 wt	HAP1 wt	HAP1 wt	HAP1 wt	HAP1 wt	HAP1 wt	HAP1 wt	clone 010	clone 010	clone 010	clone 010	clone 010	clone 010	clone 010	clone 010	clone 010	clone 006	clone 006	clone 006	clone 006	clone 006	clone 006	clone 006	clone 006	clone 006	clone 023	clone 023	clone 023	clone 023	clone 023	clone 023	clone 023	clone 023	clone 023
	rep1	rep2	rep3	rep4	rep5	rep6	rep7	rep8	rep9	rep1	rep2	rep3	rep4	rep5	rep6	rep7	rep8	rep9	rep1	rep2	rep3	rep4	rep5	rep6	rep7	rep8	rep9	rep1	rep2	rep3	rep4	rep5	rep6	rep7	rep8	rep9
0h	9.1	9.3	8.8	24.6	8.1	7.4	23.2	12.2	20	8.9	15.5	14.1	15.3	8.1	8.1	15.9	17.5	23.5	8.3	13.9	8.3	19.8	7.7	11.7	15	17.7	19.2	14.6	14.3	9.4	14.6	9.7	6.6	19.4	12.8	19.4
12h	43.4	56.1	56.4	72.9	98.3	46.7	96.9	62.4	71.6	49.2	47.1	69.1	51.8	67.9	30.7	60.1	67.2	66.9	72.9	65.7	52	64	61.7	35.7	69.2	56	59.5	47.5	50.8	60	58.1	57.8	46.7	76.8	42.2	49.3

## Sheet: Stats_Bonferroni's
Within each row, compare columns (simple effects within rows)
Number of families	2
Number of comparisons per family	3
Alpha	0.05
Bonferroni's multiple comparisons test	Mean Diff.	95.00% CI of diff.	Below threshold?	Summary	Adjusted P Value
0h
HAP1 wt vs. clone 010	-0.4485	-12.79 to 11.90	No	ns	>0.9999
HAP1 wt vs. clone 006	0.1214	-12.22 to 12.47	No	ns	>0.9999
HAP1 wt vs. clone 023	0.2161	-12.13 to 12.56	No	ns	>0.9999
12h
HAP1 wt vs. clone 010	10.54	-1.802 to 22.89	No	ns	0.1191
HAP1 wt vs. clone 006	7.56	-4.784 to 19.90	No	ns	0.4112
HAP1 wt vs. clone 023	12.84	0.4967 to 25.18	Yes	*	0.0388
Test details	Mean 1	Mean 2	Mean Diff.	SE of diff.	N1	N2	t	DF
0h
HAP1 wt vs. clone 010	13.64	14.08	-0.4485	5.021	9	9	0.08932	64
HAP1 wt vs. clone 006	13.64	13.51	0.1214	5.021	9	9	0.02419	64
HAP1 wt vs. clone 023	13.64	13.42	0.2161	5.021	9	9	0.04304	64
12h
HAP1 wt vs. clone 010	67.19	56.65	10.54	5.021	9	9	2.1	64
HAP1 wt vs. clone 006	67.19	59.63	7.56	5.021	9	9	1.506	64
HAP1 wt vs. clone 023	67.19	54.35	12.84	5.021	9	9	2.557	64

## Sheet: Stats_Dunnett's
Within each row, compare columns (simple effects within rows)
Number of families	2
Number of comparisons per family	3
Alpha	0.05
Dunnett's multiple comparisons test	Mean Diff.	95.00% CI of diff.	Below threshold?	Summary	Adjusted P Value
0h
HAP1 wt vs. clone 010	-0.4485	-12.53 to 11.63	No	ns	0.9995
HAP1 wt vs. clone 006	0.1214	-11.96 to 12.20	No	ns	>0.9999
HAP1 wt vs. clone 023	0.2161	-11.87 to 12.30	No	ns	>0.9999
12h
HAP1 wt vs. clone 010	10.54	-1.539 to 22.62	No	ns	0.1003
HAP1 wt vs. clone 006	7.56	-4.522 to 19.64	No	ns	0.3109
HAP1 wt vs. clone 023	12.84	0.7594 to 24.92	Yes	*	0.0345
Test details	Mean 1	Mean 2	Mean Diff.	SE of diff.	N1	N2	q	DF
0h
HAP1 wt vs. clone 010	13.64	14.08	-0.4485	5.021	9	9	0.08932	64
HAP1 wt vs. clone 006	13.64	13.51	0.1214	5.021	9	9	0.02419	64
HAP1 wt vs. clone 023	13.64	13.42	0.2161	5.021	9	9	0.04304	64
12h
HAP1 wt vs. clone 010	67.19	56.65	10.54	5.021	9	9	2.1	64
HAP1 wt vs. clone 006	67.19	59.63	7.56	5.021	9	9	1.506	64
HAP1 wt vs. clone 023	67.19	54.35	12.84	5.021	9	9	2.557	64

## Sheet: Stats_Sidlak's
Within each row, compare columns (simple effects within rows)
Number of families	2
Number of comparisons per family	3
Alpha	0.05
≈†√≠d√°k's multiple comparisons test	Mean Diff.	95.00% CI of diff.	Below threshold?	Summary	Adjusted P Value
0h
HAP1 wt vs. clone 010	-0.4485	-12.76 to 11.86	No	ns	0.9996
HAP1 wt vs. clone 006	0.1214	-12.19 to 12.43	No	ns	>0.9999
HAP1 wt vs. clone 023	0.2161	-12.09 to 12.53	No	ns	>0.9999
12h
HAP1 wt vs. clone 010	10.54	-1.768 to 22.85	No	ns	0.1144
HAP1 wt vs. clone 006	7.56	-4.751 to 19.87	No	ns	0.3574
HAP1 wt vs. clone 023	12.84	0.5304 to 25.15	Yes	*	0.0383
Test details	Mean 1	Mean 2	Mean Diff.	SE of diff.	N1	N2	t	DF
0h
HAP1 wt vs. clone 010	13.64	14.08	-0.4485	5.021	9	9	0.08932	64
HAP1 wt vs. clone 006	13.64	13.51	0.1214	5.021	9	9	0.02419	64
HAP1 wt vs. clone 023	13.64	13.42	0.2161	5.021	9	9	0.04304	64
12h
HAP1 wt vs. clone 010	67.19	56.65	10.54	5.021	9	9	2.1	64
HAP1 wt vs. clone 006	67.19	59.63	7.56	5.021	9	9	1.506	64
HAP1 wt vs. clone 023	67.19	54.35	12.84	5.021	9	9	2.557	64
