# Supplementary material for: Early recovery of proteasome activity in cells pulse-treated with proteasome inhibitors is independent of DDI2
Source: eLife. 2024 Apr 15;12:RP91678. doi: 10.7554/eLife.91678 (PMC11018354; doi:10.7554/eLife.91678)
Supplement: Figure 1—figure supplement 2—source data 1. [file elife-91678-fig1-figsupp2-data1.xlsx]

## Sheet: panel A
Bortezomib	HAP1	HAP1	HAP1	HAP1
(nM)	rep1	rep2	rep3	rep4
800	5.3	3.3	4.2
400	4.5	8.8	26.5
200	10.7	19.2	20.5
100	36.5	38.8	29.7
50	81.6	79.7	61.6
25	84.5	90.2	84.3
12.5	99.5	93.4	99.4
6.25	99.5	93.1
3.125
0
	MDA-MB-231	MDA-MB-231	MDA-MB-231	MDA-MB-231
900	7.5	7.5	8.2	7.7
300	9.7	13.3	10.9	8.9
100	10.2	47.4	35.6	33.1
33.3	14.3	91.7	105.1	98.6
11.1	43.1	97	105.4	104
3.7	110	102.5	97.8	102.3
1.23	103	103.5	92.6	101.2
0.41	107	93

## Sheet: panelB
	HAP1	MDA-MB-231	SUM149
	Specific activity (nmole/min*mg)
rep1	78.5	75.31	70.87
rep2	58.11	64.25	76.52
rep3	53.11	81.57
rep4	58.86	64.22
rep5	59	73.82
rep6	73.63	67.46
rep7		60.64
rep8		77.58
