# Supplementary material for: Early recovery of proteasome activity in cells pulse-treated with proteasome inhibitors is independent of DDI2
Source: eLife. 2024 Apr 15;12:RP91678. doi: 10.7554/eLife.91678 (PMC11018354; doi:10.7554/eLife.91678)
Supplement: Figure 1—source data 2. [file elife-91678-fig1-data2.xlsx]

## Sheet: Fig1c_top left
Carfilzomib (nM)	wt	wt	cl010	cl010	cl023	cl023	cl006	cl006
	rep1	rep2	rep1	rep2	rep1	rep2	rep1	rep2
800	66.6	52.3	84.7	102.1	64.1	32.3	49.6	68.5
400	84.9	76.4	113	116.1	83	53.1	74.7	90.6
200	94.3	92	106.3	152	110.1	82.8	98.4	106
100	96	88.2	115	128.9	101.9	103.9	90	110.8
50	100.8	100.4	138.6	132.5	101	101.6	95.5	88.1
25	101.3	102	111.9	107.5	116.9	123.5	99.3	117.9
12.5	103.2	98.8	132.2	137.2	121.9	116	103.5	127
6.25	108	112.9	126.6	144.9	110.4	129.7	102.4	131.2
0	100	100	100	100	100	100	100	100
All values are CellTiter-Glo signal (% of untreated control)

## Sheet: Fig1c_top right
Bortezomib (nM)	wt	wt	cl010	cl010	cl023	cl023	cl006	cl006
	rep1	rep2	rep1	rep2	rep1	rep2	rep1	rep2
800	74.3	129.4	83.8	98.8	50.5	91.6	73.6	107.7
400	75.9	128	82	87.4	56.3	93.6	73.5	116.1
200	78.7	129.2	84.7	116.2	60.4	102	82	129.7
100	85.4	139	90	105.8	66.5	114.9	84.3	143.4
50	87	120.6	89.8	85.3	73.8	116	95.5	142
25	92.8	132.9	95.7	108.2	80.6	143.6	97.5	157
12.5	85.3	130.5	100.1	92.5	87.5	113.9	97	145.4
0	100	100	100	100	100	100	100	100
All values are CellTiter-Glo signal (% of untreated control)

## Sheet: Fig1c_mid left
Carfilzomib (nM)	wt 0h	wt 0h	wt 0h	wt 0h	wt 0h	wt 12h	wt 12h	wt 12h	wt 12h	cl010 0h	cl010 0h	cl010 0h	cl010 0h	cl010 0h	cl010 12h	cl010 12h	cl010 12h	cl010 12h	cl023 0h	cl023 0h	cl023 0h	cl023 0h	cl023 0h	cl023 12h	cl023 12h	cl023 12h	cl023 12h	cl006 0h	cl006 0h	cl006 0h	cl006 12h	cl006 12h
	rep1	rep2	rep3	rep4	rep5	rep1	rep2	rep3	rep4	rep1	rep2	rep3	rep4	rep5	rep1	rep2	rep3	rep4	rep1	rep2	rep3	rep4	rep5	rep1	rep2	rep3	rep4	rep1	rep2	rep3	rep1	rep2
800	1.6	1.8	1.4			1.8	2			1.7	2	1			1.6	2.9			1.4	1.2	0.8			2.1	1.9			1.7	2	1	3.2	3.9
400	1.6	3.9	1.8			5	8.6			2.4	3.2	1.8			6.7	8.1			2.1	2.1	1.3			6.1	4.6			2.4	3.1	1.8	5.1	9.5
200	2	3.6	2			13.1	20.7			3.2	3.7	1.8			10.3	19.1			2.2	2.8	1.8			10.6	6.9			2.1	4.3	2.5	9.8	15.3
100	2.7	4.6	4.9	1.9	3.3	15.8	51.3	63.4	50	3.5	4.5	3.2	2.8	2.9	19.5	35.3	58.4	17.4	3.1	3.6	2.6	2.6	2.7	19.4	27.5	61.8	21.5	4.7	5.2	3.4	30.2	34.8
50	5.1	8.1	12.6	4.2	6.6	17.9	49.1	66.5	44.1	6.8	8.9	7.1	6.6	4.5	23.3	35.2	65.6	27.2	4.6	6.1	5.9	8.6	3.9	22.4	28.5	57.6	18.5	6.4	8.5	7	29.9	35.4
25	10.1	17.9	22.7			21.1	60.9			12.6	19	20.4			27.9	33.4			9	12.4	15.8			24.9	29.3			12.5	27.3	17	30.4	36.7
12.5	24.8	35.6	37			31	55.1			33.8	36.9	31.1			39.7	50.9			23.6	27.4	25.3			33.4	28.1			35.3	33.4	25.5	44.7	52.1
6.3	31.2		29.1			28.3	47.8			31.2		29			38.5	47.4			32.9		28.3			63.1	39.9			31.1		33.9	38.9	51.1
All values are beta5 activity (% of untreated control)

## Sheet: Fig1c_mid right
Bortezomib (nM)	wt 0h	wt 0h	wt 0h	wt 0h	wt 0h	wt 0h	wt 0h	wt 0h	wt 0h	wt 0h	wt 0h	wt 12h	wt 12h	wt 12h	wt 12h	wt 12h	wt 12h	wt 12h	wt 12h	wt 12h	cl 010 0h	cl 010 0h	cl 010 0h	cl 010 0h	cl 010 0h	cl 010 0h	cl 010 0h	cl 010 0h	cl 010 0h	cl 010 0h	cl 010 0h	cl 010 12h	cl 010 12h	cl 010 12h	cl 010 12h	cl 010 12h	cl 010 12h	cl 010 12h	cl 010 12h	cl 010 12h	cl 023 0h	cl 023 0h	cl 023 0h	cl 023 0h	cl 023 0h	cl 023 0h	cl 023 0h	cl 023 0h	cl 023 0h
	rep1	rep2	rep3	rep4	rep5	rep6	rep7	rep8	rep9	rep10	rep11	rep1	rep2	rep3	rep4	rep5	rep6	rep7	rep8	rep9	rep1	rep2	rep3	rep4	rep5	rep6	rep7	rep8	rep9	rep10	rep11	rep1	rep2	rep3	rep4	rep5	rep6	rep7	rep8	rep9	rep1	rep2	rep3	rep4	rep5	rep6	rep7	rep8	rep9
800	1.8	2.4	1.8	8.3	2.3							4.7	9.2	6.3							2.3	4.2	3.1	7.7	4.4							7.6	6.9	11.3							6.3	4.3	3.6	5.9	4.2
400	2.5	2.6	2	9.5	2.5						2.7	19	25.1	13.1							2.5	4.1	3.7	13.2	4.7						2.7	11.3	15.1	18						30.7	6	4.7	3.9	6.7	5.2
200	4.1	3.8	3.5	11.9	3.7						3.1	26.4	50.5	39.2						91.4	3.5	5.7	4.5	13.7	6.3						3.1	30.5	22	34.1						52.6	9.6	6	4.3	6.5	6.5
100	4.6	4.6	2.9	13.6	4.4	4	4.1	3.8	3.9	4.3	4.3	75.7	60.1	58.8	36.1	57.1	19.4	50.2	94	94	6.5	6	4.6	17.5	6.7	3.5	3.9	2.9	3.7	2.9	3.7	43.1	42.5	59.4	54.1	55.2	14.4	57.7	37.6	57.7	10.1	7.5	4.3	9	7.4	4.4	3.9	3.2	4.2
50	8.3	7.4	3.8	17	7.8	5.7	5.7	4.7	4.4			82.2	68.2	51.6	45.3	70.9	27.8	25		94	7.2	9.7	7.1	22	9.7	4.9	5.1	4.9		4.9	6.4	57	77.1	62	56.8	64.3	26		39.6	79.8	11.1	9.2	5.2	12.9	8.5	6.1	5.3	4.3
25	22.6	16.4	11.8	32.8	14.7							72	74.6	72.8							15.3	18.3	18.3	41.5	18.2							58.9	63.9	80.2							27.1	16.5	13	28.7	15.5
12.5	49.3	33.6	27.3	53.6	30.3							109.5	77.2	67.6							42	48.8	38.5	81.8*	49.6							68.3	96	81.8							41.3	35.4	28.3	47.9	27.2
												100	100	100							100	100	100	100	100							100	100	100							100	100	100	100	100
All values are beta5 activity (% of untreated control)
[truncated: 18 more columns]

## Sheet: Fig1c_bottom left
Carfilzomib (nM)	wt 0h	wt 0h	wt 0h	wt 0h	wt 0h	wt 24h	wt 24h	cl010 0h	cl010 0h	cl010 0h	cl010 0h	cl010 0h	cl010 24h	cl010 24h	cl023 0h	cl023 0h	cl023 0h	cl023 0h	cl023 0h	cl023 24h	cl023 24h	cl006 0h	cl006 0h	cl006 0h	cl 006 24h	cl 006 24h
	rep1	rep2	rep3	rep4	rep5	rep1	rep2	rep1	rep2	rep3	rep4	rep5	rep1	rep2	rep1	rep2	rep3	rep4	rep5	rep1	rep2	rep1	rep2	rep3	rep1	rep2
800	1.6	1.8	1.4			9.1	15.4	1.7	2	1			5.5	12	1.4	1.2	0.8			3	8.3	1.7	2	1	12.1	13.4
400	1.6	3.9	1.8			21.7	38.5	2.4	3.2	1.8			15.1	39.1	2.1	2.1	1.3			11.6	21.6	2.4	3.1	1.8	27.5	24.4
200	2	3.6	2			46.7	51.6	3.2	3.7	1.8			36.4	51.8	2.2	2.8	1.8			26.5	35.2	2.1	4.3	2.5	26.5	34.7
100	2.7	4.6	4.9	1.9	3.3	71.3	52.4	3.5	4.5	3.2	2.8	2.9	46.5	57.5	3.1	3.6	2.6	2.6	2.7	48.1	43.4	4.7	5.2	3.4	43.3	57.6
50	5.1	8.1	12.6	4.2	6.6	67.9	59.3	6.8	8.9	7.1	6.6	4.5	52.9	57.3	4.6	6.1	5.9	8.6	3.9	49	52.7	6.4	8.5	7	45.3	54.1
25	10.1	17.9	22.7			62	61	12.6	19	20.4			52.8	74.5	9	12.4	15.8			56.7	51.5	12.5	27.3	17	53.9	57
12.5	24.8	35.6	37			58.8	60.8	33.8	36.9	31.1			50.2	71.9	23.6	27.4	25.3			57.8	44.2	35.3	33.4	25.5	62.3	56.6
6.3	31.2		29.1			56.7	60	31.2		29			51.7	79.6	32.9		28.3			56.3	53.4	31.1		33.9	73.2	62.7
0	100	100	100			100	100	100	100	100			100	100	100	100	100			100	100	100	100	100	100	100
All values are beta5 activity (% of untreated control)
