# Supplementary material for: Early recovery of proteasome activity in cells pulse-treated with proteasome inhibitors is independent of DDI2
Source: eLife. 2024 Apr 15;12:RP91678. doi: 10.7554/eLife.91678 (PMC11018354; doi:10.7554/eLife.91678)
Supplement: Figure 1—source data 5. [file elife-91678-fig1-data5.xlsx]

## Sheet: SUM149
	beta 5 activity (% untreated control)
	0h	0h	0h	0h	18h	18h	18h	18h
	rep1	rep2	rep3	rep4	rep1	rep2	rep3	rep4
no siRNA	16.8	11.6	14.9	18	47.6	45.6	61.3	68.3
scrambled	17.1	26.5	14.9		69.6	86.3	51.5
siRNA10	9.1	8.1	13.7	18	109.6	108.8	47.4	77.6
siRNA12	18.1	19.2	14.8	20.1	57.7	67.1	72.8	30.8
Statistical analysis
Number of families	2
Number of comparisons per family	3
Alpha	0.05
Dunnett's multiple comparisons test	Predicted (LS) mean diff.	95.00% CI of diff.	Below threshold?	Summary	Adjusted P Value
0h
scrambled vs. no siRNA	4.17	-24.12 to 32.46	No	ns	0.963
scrambled vs. siRNA10	7.275	-21.01 to 35.56	No	ns	0.8446
scrambled vs. siRNA12	1.455	-26.83 to 29.74	No	ns	0.9982
18h
scrambled vs. no siRNA	13.43	-14.86 to 41.71	No	ns	0.4899
scrambled vs. siRNA10	-16.71	-45.00 to 11.57	No	ns	0.3255
scrambled vs. siRNA12	12.04	-16.25 to 40.33	No	ns	0.5696
Test details	Predicted (LS) mean 1	Predicted (LS) mean 2	Predicted (LS) mean diff.	SE of diff.	N1	N2	q	DF
0h
scrambled vs. no siRNA	19.5	15.33	4.17	11.3	3	4	0.3691	22
scrambled vs. siRNA10	19.5	12.23	7.275	11.3	3	4	0.6439	22
scrambled vs. siRNA12	19.5	18.05	1.455	11.3	3	4	0.1288	22
18h
scrambled vs. no siRNA	69.13	55.71	13.43	11.3	3	4	1.188	22
scrambled vs. siRNA10	69.13	85.85	-16.71	11.3	3	4	1.479	22
scrambled vs. siRNA12	69.13	57.09	12.04	11.3	3	4	1.066	22

## Sheet: MDA-MB-231
	beta 5 activity (% untreated control)
	0h	0h	0h	0h	0h	18h	18h	18h	18h	18h	18h	18h	18h
	rep1	rep2	rep3	rep4	rep5	rep1	rep2	rep3	rep4	rep5	rep6	rep7	rep87
no siRNA	6.77	5.78	9.4	4.6	3.9	39.12	41.44	77	22.3	32.9	64.8	50.5	38.3
scrambled	11	16.2	17.2			65.4	80.3	51.2
siRNA10	11.11	7.65	2.6	3.3	4.2	24.1	37.69	22.8	21.3	36.1	72.1
siRNA12	6.73	6.47	18.4			33.44	31.63	55.3
Statistical analysis
Within each column, compare rows (simple effects within columns)
Number of families	2
Number of comparisons per family	3
Alpha	0.05
Dunnett's multiple comparisons test	Mean Diff.	95.00% CI of diff.	Below threshold?	Summary	Adjusted P Value
0h recovery
scrambled vs. no siRNA	8.71	-1.911 to 19.33	No	ns	0.0726
scrambled vs. siRNA10	9.028	-14.28 to 32.34	No	ns	0.2622
scrambled vs. siRNA12	4.267	-14.54 to 23.07	No	ns	0.5167
18h recovery
scrambled vs. no siRNA	19.84	-79.53 to 119.2	No	ns	0.5801
scrambled vs. siRNA10	29.95	-5.581 to 65.48	No	ns	0.069
scrambled vs. siRNA12	25.51	-66.16 to 117.2	No	ns	0.4094
Test details	Mean 1	Mean 2	Mean Diff.	SE of diff.	N1	N2	q	DF
0h recovery
scrambled vs. no siRNA	14.8	6.09	8.71	1.782	3	5	4.887	2
scrambled vs. siRNA10	14.8	5.772	9.028	3.912	3	5	2.308	2
scrambled vs. siRNA12	14.8	10.53	4.267	3.155	3	3	1.352	2
18h recovery
scrambled vs. no siRNA	65.63	45.8	19.84	16.88	3	8	1.175	2
scrambled vs. siRNA10	65.63	35.68	29.95	6.036	3	6	4.963	2
scrambled vs. siRNA12	65.63	40.12	25.51	15.57	3	3	1.638	2
