# Supplementary material for: Early recovery of proteasome activity in cells pulse-treated with proteasome inhibitors is independent of DDI2
Source: eLife. 2024 Apr 15;12:RP91678. doi: 10.7554/eLife.91678 (PMC11018354; doi:10.7554/eLife.91678)
Supplement: Figure 1—source data 6. [file elife-91678-fig1-data6.xls]

## Sheet: Fig1g_top
BTZ (nM)	HCT 116 wt- 0h	HCT 116 wt- 0h	HCT 116 wt- 0h	HCT DDI2 DN- 0h	HCT DDI2 DN- 0h	HCT DDI2 DN- 0h	HCT 116 wt- 18h	HCT 116 wt- 18h	HCT DDI2 DN- 18h	HCT DDI2 DN- 18h
	rep1	rep2	rep3	rep1	rep2	rep3	rep1	rep2	rep1	rep2
1600	1.7	1.6	2.9	0.4	1.3	2.7	8.5063	4	10.7	15.8
800	2.4	2.5	3.4	0.5	1.8	3.3	33.9634	11.2	18.4	31.4
400	3.5	3.8	4.6	1.2	2.1	4.1	38.0232	31.1	34.5	39.1
200	4.1	4.7	4.9	1.3	2.3	5	52.0805	54.3	42.3	65.5
100	4.9	5.2	6.3	1.4	3.9	6	73.8419	68.1	52.3	66.3
50	7.5	7.7	10.2	2.2	6.6	8.8	76.6974	72.6	55.8	69.8
25	15.5	25	25.8		21	19	76.6441	74	60.2	71.4
12.5	34.9	53.4	42.3		31.4	42.4	78.7666	70.7	60.1	69.2
6.25		71			39.7			71.3		76.6
0	100	100		100	100		100		100	100
All values are beta5 activity as % of untreated control

## Sheet: Fig.1G  bottom
CFZ (nM)	HCT 116 wt- 0h	HCT 116 wt- 0h	HCT Ddi2 DN- 0h	HCT Ddi2 DN- 0h	HCT 116 wt- 18h	HCT 116 wt- 18h	HCT Ddi2 DN- 18h	HCT Ddi2 DN- 18h
	rep1	rep2	rep1	rep2	rep1	rep2	rep1	rep2
1600	4.7	0.7	1.1	0.5	-2.1	1	1.2018	1
800	5.8	1.2	2	0.7		3	3.4567	2.4
400	7.9	2.1	2.9	1.2	12.4	16.3	20.6294	8.1
200	8.9	2.9	3.7	1.6	32.8	37.6	32.5556	28.9
100	12.1	4.2	4.5	2.2	47	60.5	58.386	49.1
50	17.7	5.7	7.8	2.8	60.9	80.4	75.4244	47.8
25	47.9	13.1	15	6.2	68.1	89.2	72.6464	56.5
12.5		31.2	39	16.3	71	84.5	77.8685	56.7
6.25		45.7		31.5		82.7		55.1
0	100	100	100	100	100	100	100	100
All values are beta5 activity as % of untreated control
