# Supplementary material for: Early recovery of proteasome activity in cells pulse-treated with proteasome inhibitors is independent of DDI2
Source: eLife. 2024 Apr 15;12:RP91678. doi: 10.7554/eLife.91678 (PMC11018354; doi:10.7554/eLife.91678)
Supplement: Figure 2—source data 1. [file elife-91678-fig2-data1.xlsx]

## Sheet: Fig2a_data
hrs after treatm	% beta5 activity remaining
	rep1	rep2	rep3	rep4
0	4	4.1	3.8	4.3
1	9.4	8.8	16.3
2	13.8	20.2	16.7	10.4
5	40.6	25.2	20.4	12.8
8	25.7	64.4	45.9	56.5
12	36.1	57.1	19.4	94

## Sheet: Fig2b data
time recovery (h)	PSMA1	PSMA1	PSMA1	PSMA2	PSMA2	PSMA2	PSMA4	PSMA4	PSMA4	PSMA7	PSMA7	PSMA7	PSMB4	PSMB4	PSMB4	PSMB5	PSMB5	PSMB5	PSMB6	PSMB6	PSMB6	PSMB7	PSMB7	PSMB7	PSMC1	PSMC1	PSMC1	PSMC3	PSMC3	PSMC3	PSMC4	PSMC4	PSMC4	PSMD6	PSMD6	PSMD6	PSMD11	PSMD11	PSMD11	PSMD12	PSMD12	PSMD12	PSMD14	PSMD14	PSMD14
	rep1	rep2	rep3	rep1	rep2	rep3	rep1	rep2	rep3	rep1	rep2	rep3	rep1	rep2	rep3	rep1	rep2	rep3	rep1	rep2	rep3	rep1	rep2	rep3	rep1	rep2	rep3	rep1	rep2	rep3	rep1	rep2	rep3	rep1	rep2	rep3	rep1	rep2	rep3	rep1	rep2	rep3	rep1	rep2	rep3
0	2	0.7	1	0.7	1.3	1.2	1.8	1.1	0.6	2.6	1.2	0.8	0.9	1.1	0.8	0.7	0.8	1.2	1.5	1.3	0.9	1.6	1.1	0.8	2.6	1.6	1	3.3	0.8	0.7	2.3	1.1	0.6	2.7	1.9	0.74	1.9	1.5	0.9	2.3	2.5	1.1	1.4	2.3	1
1		0.9	0.7		1.6	0.7		1.1	0.5		0.5	0.8		1.1	0.7		1.2	1.3		1.7	0.9		2.1	0.7		2.1	0.9		1.2	0.6		1.6	0.6		2.6	0.55		2.4	0.6		3.3	0.5		3	0.5
2	0.8	1.2	0.5	0.7	2.2	0.8	0.9	1.4	0.6	1.2	1.4	1.2	1.2	1.4	0.8	0.5	1.4	0.9	1.1	1.9	1.1	1.1	2.5	0.7	1.3	2.7	0.8	1.1	1.4	0.8	0.8	1.9	0.6	1.1	3	0.64	0.7	2.9	0.6	1	4.6	0.5	0.9	3.7	0.6
5	0.7	1.6	0.7	0.9	1.9	1	0.6	1.1	0.7	1.1	0.9	1.1	0.9	2.9	0.7	0.8	2.3	1.2	0.4	3.1	1.4	0.6	3.6	0.7	0.9	2.3	1.1	0.7	2	0.9	0.4	3.7	0.7	0	2.8	0.65	1.1	5.5	0.9	0.8	4.3	0.4	0.9	3.1	0.6
8	2.3	2.3	3	1.9	2.5	2.4	1.5	1.2	3.2	1.6	1.1	0.7	2.6	3.1	1.2	1.7	2.7	1.1	1.9	2.4	1	3.5	3.8	1.6	3.7	2.2	1.7	3.5	2.5	1.1	5.6	6.2	1.5	0	3.4	2.03	4	9.9	1.5	3.3	4.1	3.8	3	2.4	3.7

## Sheet: Fig 2b_t-test
	PSMA1	PSMA2	PSMA4	PSMA7	PSMB4	PSMB5	PSMB6	PSMB7	PSMC1	PSMC3	PSMC4	PSMC6	PSMD1	PSMD1	PSMD6	PSMD9	PSMD11	PSMD14
Theoretical mean	1	1	1	1	1	1	1	1	1	1	1	1	1	1	1	1	1	1
Actual mean	2.533	2.267	1.967	1.2	2.967	1.833	1.767	2.967	2.7	2.367	4.433	3.533	1.353	5.83	2.715	6.033	5.133	3.033
Number of values	3	3	3	3	3	3	3	3	3	3	3	3	3	3	2	3	3	3
One sample t test
t, df	t=6.571, df=2	t=6.825, df=2	t=1.552, df=2	t=0.6222, df=2	t=10.60, df=2	t=1.786, df=2	t=1.872, df=2	t=2.855, df=2	t=2.944, df=2	t=1.964, df=2	t=2.325, df=2	t=1.177, df=2	t=0.3581, df=2	t=1.347, df=2	t=2.504, df=1	t=2.006, df=2	t=1.660, df=2	t=5.413, df=2
P value (two tailed)	0.0224	0.0208	0.2608	0.5973	0.0088	0.2161	0.2021	0.1039	0.0986	0.1886	0.1457	0.3604	0.7545	0.3102	0.2419	0.1827	0.2388	0.0325
P value summary	*	*	ns	ns	**	ns	ns	ns	ns	ns	ns	ns	ns	ns	ns	ns	ns	*
Significant (alpha=0.05)?	Yes	Yes	No	No	Yes	No	No	No	No	No	No	No	No	No	No	No	No	Yes
How big is the discrepancy?
Discrepancy	1.533	1.267	0.9667	0.2	1.967	0.8333	0.7667	1.967	1.7	1.367	3.433	2.533	0.3533	4.83	1.715	5.033	4.133	2.033
SD of discrepancy	0.4041	0.3215	1.079	0.5568	0.3215	0.8083	0.7095	1.193	1	1.206	2.558	3.729	1.709	6.209	0.9687	4.347	4.313	0.6506
SEM of discrepancy	0.2333	0.1856	0.6227	0.3215	0.1856	0.4667	0.4096	0.6888	0.5774	0.696	1.477	2.153	0.9867	3.585	0.685	2.51	2.49	0.3756
95% confidence interval	0.5294 to 2.537	0.4681 to 2.065	-1.713 to 3.646	-1.183 to 1.583	1.168 to 2.765	-1.175 to 2.841	-0.9957 to 2.529	-0.9970 to 4.930	-0.7841 to 4.184	-1.628 to 4.361	-2.921 to 9.788	-6.729 to 11.80	-3.892 to 4.599	-10.59 to 20.25	-6.989 to 10.42	-5.764 to 15.83	-6.581 to 14.85	0.4171 to 3.650
R squared (partial eta squared)	0.9557	0.9588	0.5465	0.1622	0.9825	0.6146	0.6366	0.803	0.8126	0.6584	0.7299	0.4091	0.06026	0.4758	0.8624	0.6679	0.5794	0.9361
