# Supplementary material for: Early recovery of proteasome activity in cells pulse-treated with proteasome inhibitors is independent of DDI2
Source: eLife. 2024 Apr 15;12:RP91678. doi: 10.7554/eLife.91678 (PMC11018354; doi:10.7554/eLife.91678)
Supplement: Figure 3—source data 1. [file elife-91678-fig3-data1.xlsx]

## Sheet: Fig3a_data all panels
	Time (hours)	wt HAP1 + CHX	wt HAP1 + CHX	wt HAP1 + CHX	wt HAP1 + CHX	wt HAP1	wt HAP1	wt HAP1	wt HAP1	c023 KO + CHX	c023 KO + CHX	c023 KO + CHX	c023 KO + CHX	c023 KO	c023 KO	c023 KO	c023 KO	c006 KO + CHX	c006 KO + CHX	c006 KO + CHX	c006 KO + CHX	c006KO	c006KO	c006KO	c006KO	c010 KO + CHX	c010 KO + CHX	c010 KO + CHX	c010 KO + CHX	c010 KO	c010 KO	c010 KO	c010 KO
		rep1	rep2	rep3	rep4	rep1	rep2	rep3	rep4	rep1	rep2	rep3	rep4	rep1	rep2	rep3	rep4	rep1	rep2	rep3	rep4	rep1	rep2	rep3	rep4	rep1	rep2	rep3	rep4	rep1	rep2	rep3	rep4
Cfz 100nM	0	6.4	5.4	7.7	3.3	6.4	5.4	7.7	3.3	3.9	3.6	3.5	2.7	3.9	3.6	3.5	2.7	7.7	4.1	4.7		7.7	4.1	4.7		6.6	5	6.5	2.9	6.6	5	6.5	2.9
	1	12.6	6.2	12.6		16	6	8.7		0.8	7.3	6.9		3	9.5	5		8.1	7.4	11.6		9.7	7.6	10.5		8.3	5	10.1		10.2	7.7	8.8
	2	9.2	9.5	10.3	5.9	14.1	15.8	12.3	5.9	0.7	7.4	7.2	7.7	5.3	10.8	7.1	7.7	7.3	7	15.3		12.9	10	12.2		9.5	8.3	12.2	5.9	13.4	13	12.5	5.9
	5	12.8	7.6	11.6		19.3	20.6	22.9	12.4	4.8	5.4	6.7		19.3	17	18	12.6	1.5	6.2	10.1		18.8	14.9	33.6		7.2	7.2	8.9		22.2	17.7	25.9	10.4
	8	8.9	5.9	10.4	18.9	37.6	24.6	35	39.7	5.7	5.1	5.7	6.8	25.6	20.8	25.3	17.6	6.3	6.7	5.5		30.7	23.6	28.4		9.1	6.2	3.7	8.6	34.9	20.9	30.1	17.9
Cfz 50nM	0	16	10.5	15.7	6.6	16	10.5	15.7	6.6	7.5	6.5	14.4	3.9	7.5	6.5	14.4	3.9	6.8	8.3	12.3		17.3	8.3	12.3		17.2	10.5	13	4.5	17.2	10.5	13	4.5
	1	23.9	12	26.2		27.6	12.9	12.6		1.2	13.9	10.6		2.5	15.5	10		14.8	11.2	27.2		13.9	10.3	24.6		12.7	10	19.7		15.7	11.5	12.6
	2	24.3	17.7	21.5	12.7	23.6	15.4	20	12.7	2.6	13.8	15.4	9.7	4.4	19.5	11.3	9.7	21.3	9.2	30.1		19.2	16.2	20.9		21.4	14.7	28	7.9	22.3	20.6	22.6	7.9
	5	12.9	13.9	22.4		30.8	26.3	22.7	27	15.7	6.6	15		28.6	28.4	26.4	16.5	8.5	19.4	11		26.8	29.4	28.3		12.5	12.2	17.1		32.6	27.2	38.9	13.6
	8	15.8	11.9	16.3	16.1	36.7	34.7	49.7	34.9	9.1	8.8	10	9.4	44.2	25.1	28	13.7	10.9	11.7	8.6		34.3	29.5	36.6		14.7	9.8	6.4	10.1	38.2	24.6	31.2	13.1
Btz 100nM	0	4	4.12	3.8	3.9	4	4.12	3.8	3.9	4.4	3.88	3.2	3.2	4.4	3.88	3.2	3.2									3.5	3.89	2.9	2.9	3.5	3.89	2.9	2.9
	1	12.8	7.6	12.7		9.4	8.8	16.3		11.6	7.6	13.2		9.8	7.1	14.4										10.4	10.5	11.2		9.3	11.1	14.2
	2	13.8	11	12.1	7.9	13.8	20.2	16.7	7.9	15.9	16.9	16.4	13.1	19.4	17.4	15.5	13.1									19.9	13	11.3	11.2	32.3	18.6	19.5	11.2
	5	28	11.5	9.8		40.6	25.2	20.4	24.9	16.5	18.2	14.3		22.3	25.7	30.3	18									18.5	18.3	16.6		26.5	20.1	29.3	30.4
	8	21.6	18.6	20.1	13.8	25.7	64.4	45.9	33.8	20.8	12.7	17.4	13.4	28.1	38.6	37.1	18.3									13.7	14.7	16.2	13.8	26.5	38.6	39.1	22.7
	12	29.2	9.8	20	17.6	36.1	57.1	19.4	50.2	27.7	9.2	9.4	13.3	32.5	53.2	11.3	32									19	13	14.2	23.3	54.1	55.2	14.4	37.6
Btz 50nM	0	5.7	5.67	4.7	4.4	5.7	5.67	4.7	4.4	6.1	5.34	4.3	3.2	6.1	5.34	4.3	5									4.9	5.05	4.9	4.9	4.9	5.05	4.9	4.9
	1	14.1	8.5	20		13.8	10.1	21.2		12.9	9.6	17.9		10.8	10.3	20.4										11.7	13.4	14.4		12.7	12.9	17.9
	2	15.9	13.6	17.1	10.9	23.1	21.3	23.4	10.9	15.9	21.6	15.8	13.1	26.1	25.6	17.4	13.8									19.9	16.8	12.9	10.8	34.6	25.3	19.5	10.8
	5	30.5	15.2	14		51	34.6	20.5	31	18.1	19.7	24		24.5	29.4	30.8	29.5									20.3	12.8	18.6	33	33	34.3	39.7
	8	32.2	19.1	25.1	11.4	29.5	71	59.6	23.1	35.9	18.4	23.6	20.3	47.4	50.4	50.1	28.4									24.4	16	16.9	18.6	40.2	53	44.7	34.7
	12	31.1	12.7	27.3	11.3	45.3	70.9	27.8	25	31.8	12.5	13.2	12.1	49	63.4	16.5	32.4									23.3	16.3	20	21.7	56.8	64.3	26	39.6
