# Supplementary material for: Early recovery of proteasome activity in cells pulse-treated with proteasome inhibitors is independent of DDI2
Source: eLife. 2024 Apr 15;12:RP91678. doi: 10.7554/eLife.91678 (PMC11018354; doi:10.7554/eLife.91678)
Supplement: Figure 3—source data 2. [file elife-91678-fig3-data2.xlsx]

## Sheet: FIg3b_source
PSMA1	PSMA2	PSMA4	PSMA7	PSMB4	PSMB5	PSMB6	PSMB7	PSMC1	PSMC3	PSMC4	PSMA5	PSMD1	PSMD6	PSMD11	PSMD13	PSMD14
99.1	99.52	97.38	99.33	99.62	97.42	96.39	98.83	98.85	96.39	99.34	96.65	93.85	99.36	99.48	80.7	99.65
92.6	97.2	98.4	97.86	97.48	98.96	99.85	97.69	97.39	98.65	98.43	96.62	98.72	97.92	98.57	70.2	97.97
99.9	99.84	99.81			99.94		99.89	99.84	99.82	99.93			99.95	99.97		99.92
All numbers is the fraction (in %) of mRNA that is transalted
