# Supplementary figures and images for: Early recovery of proteasome activity in cells pulse-treated with proteasome inhibitors is independent of DDI2
Source: eLife journal article supplement (doi:10.7554/elife.91678), 2023-10-27

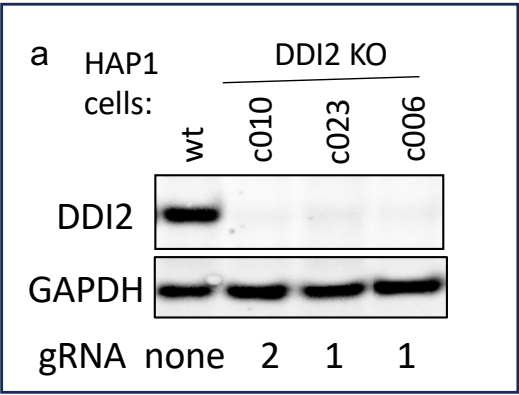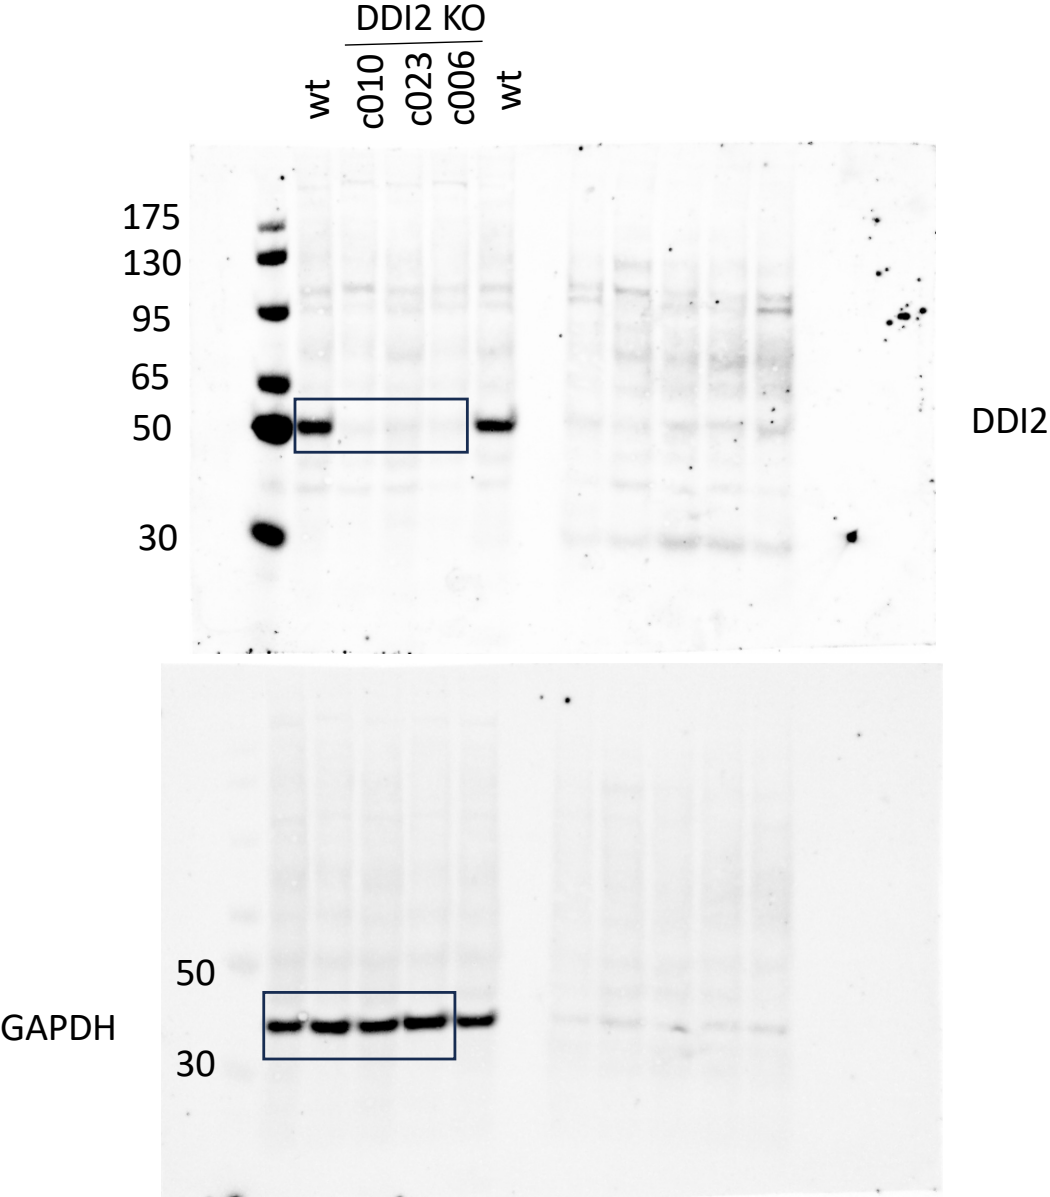

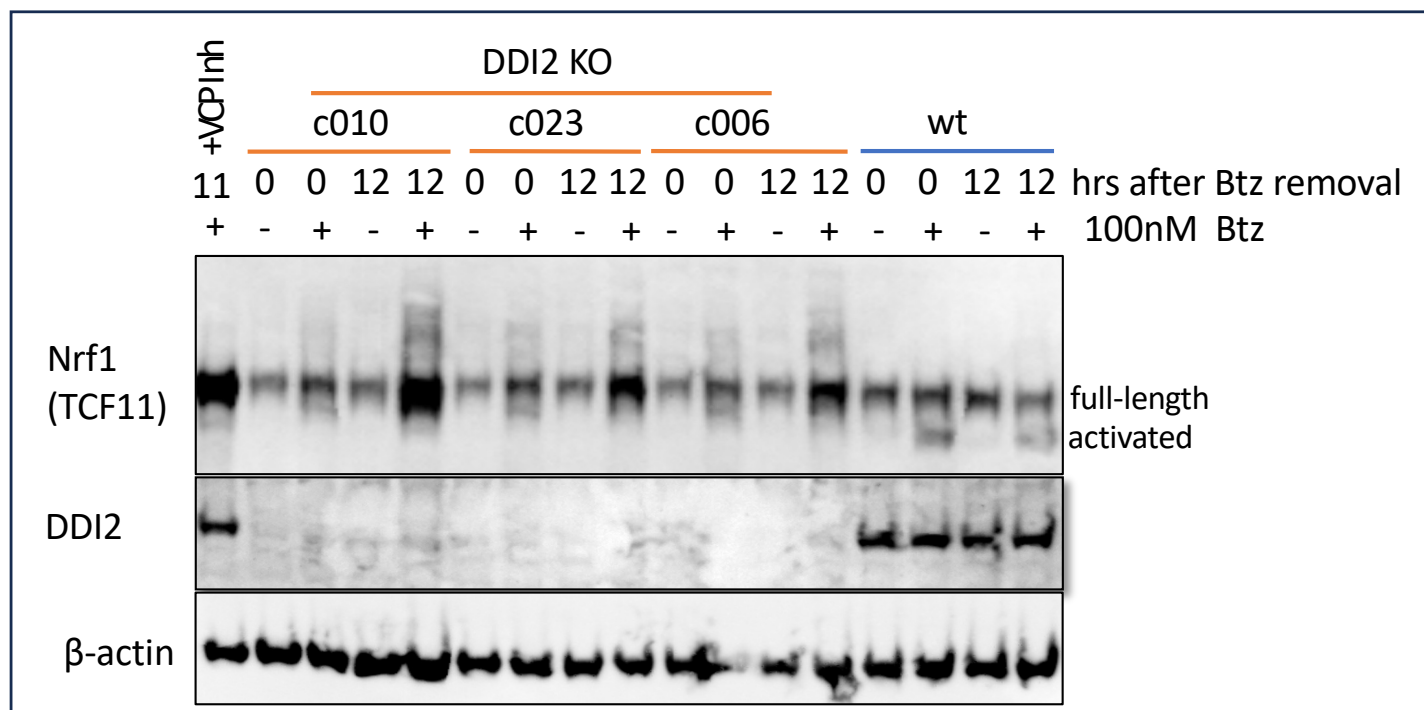

Nrf1 (TCF11)

DDI2 Ab after Nrf1 antibodies

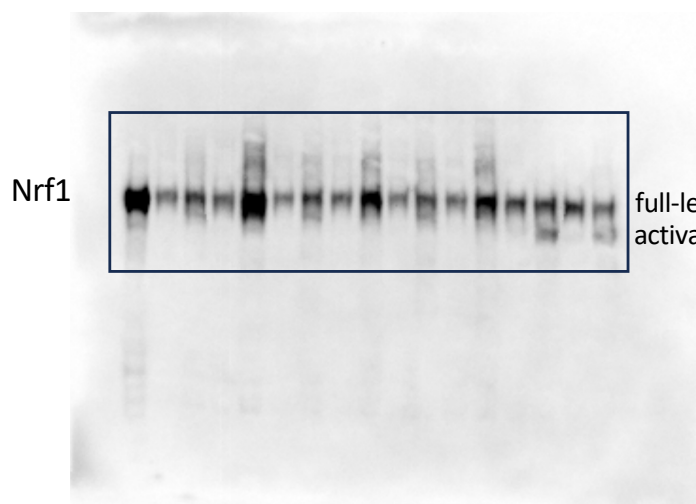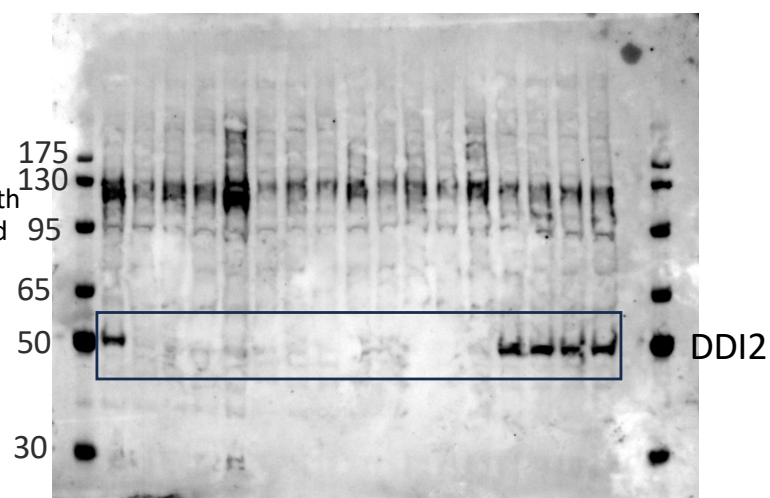

β-actin

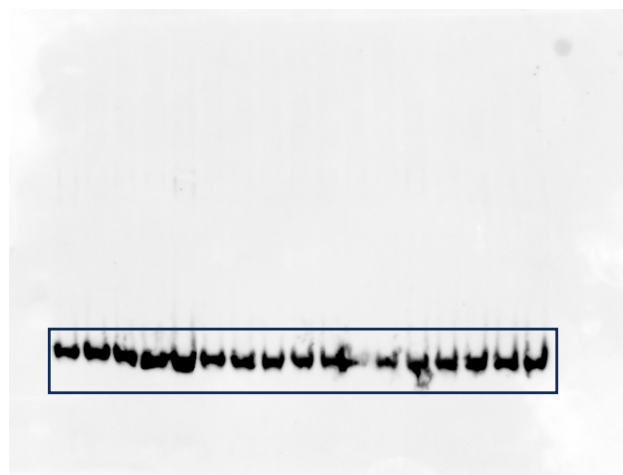

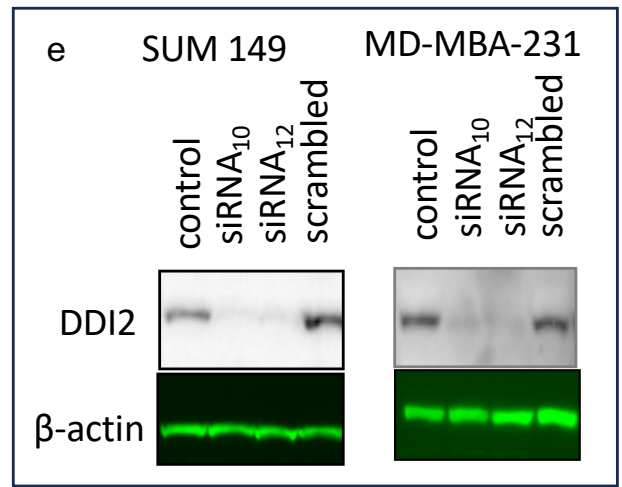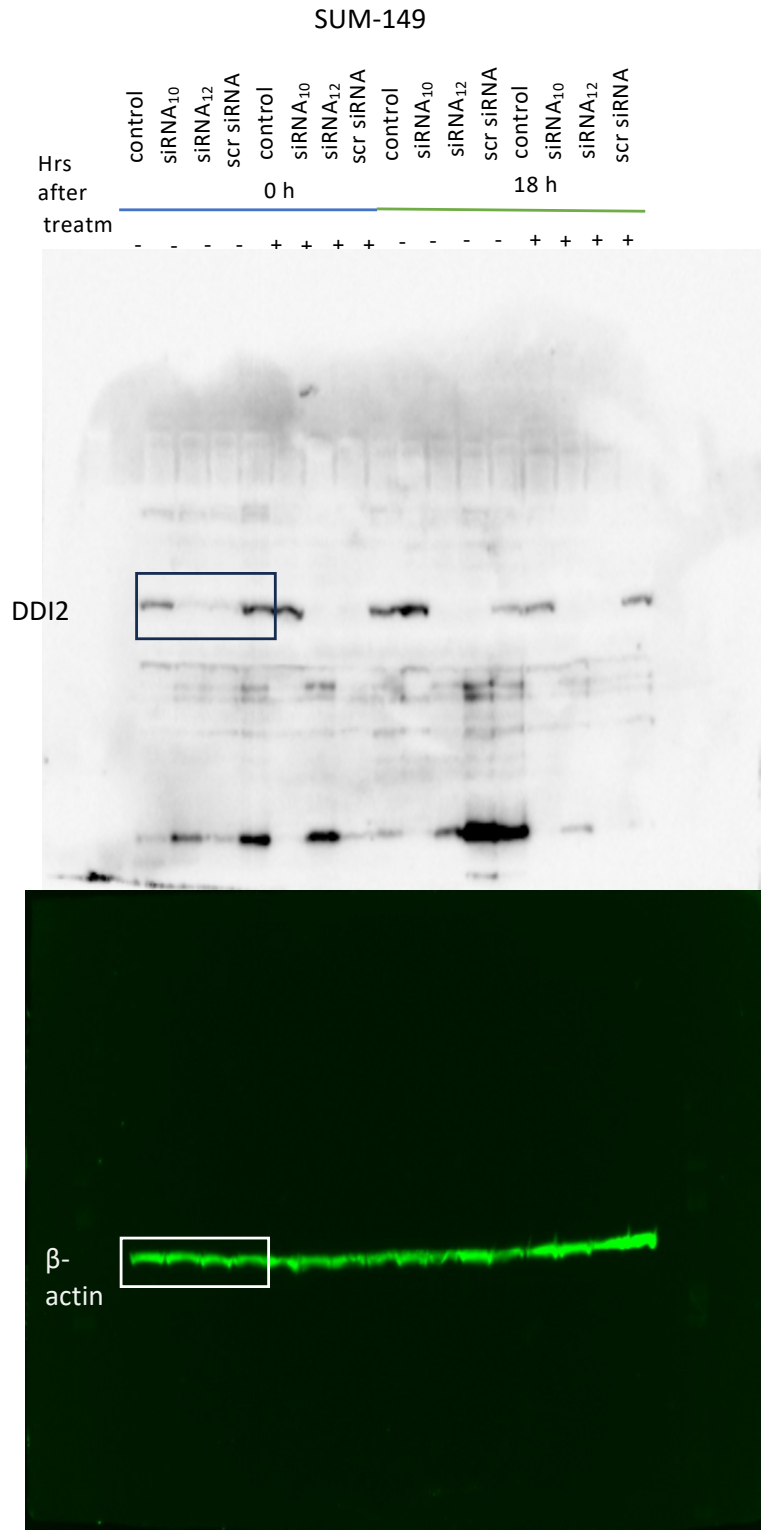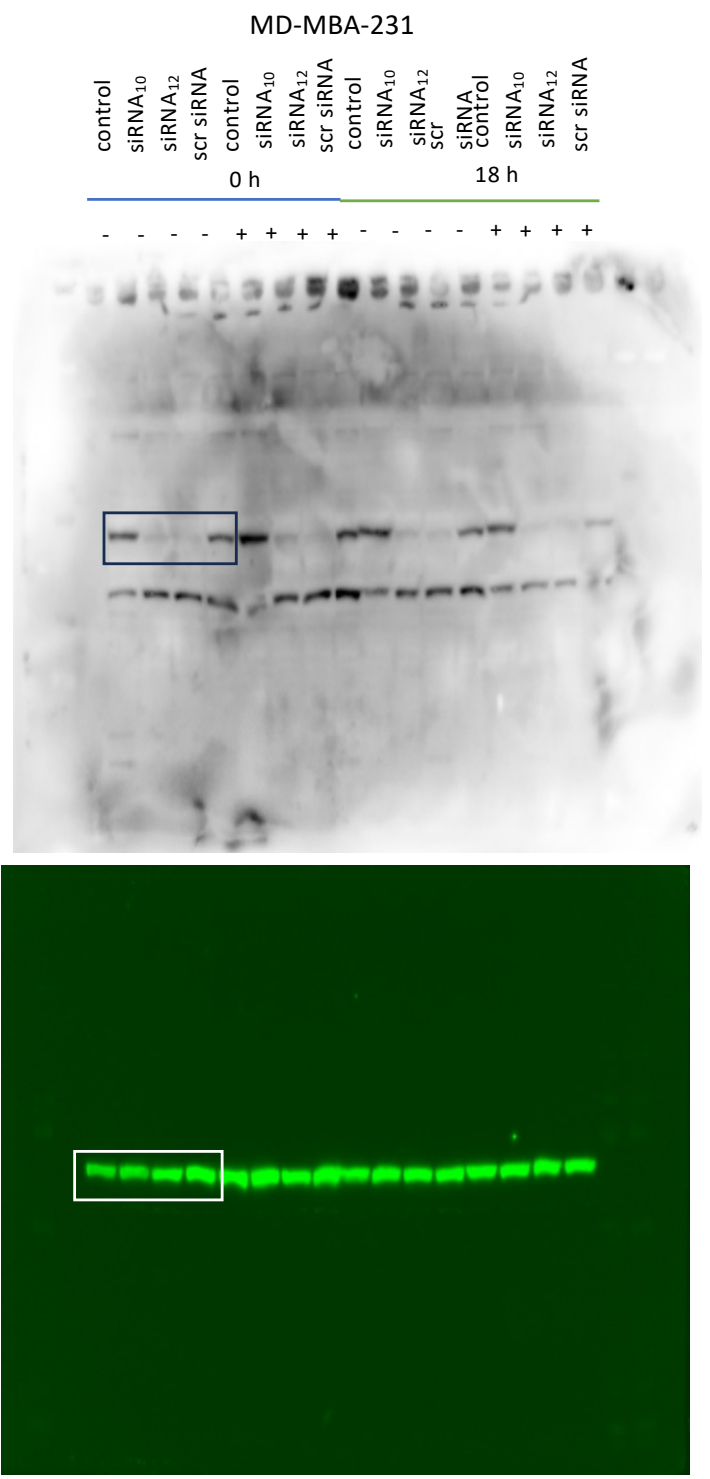

Supplement: fig1-data1 [file elife-91678-fig1-data1-v1.zip]

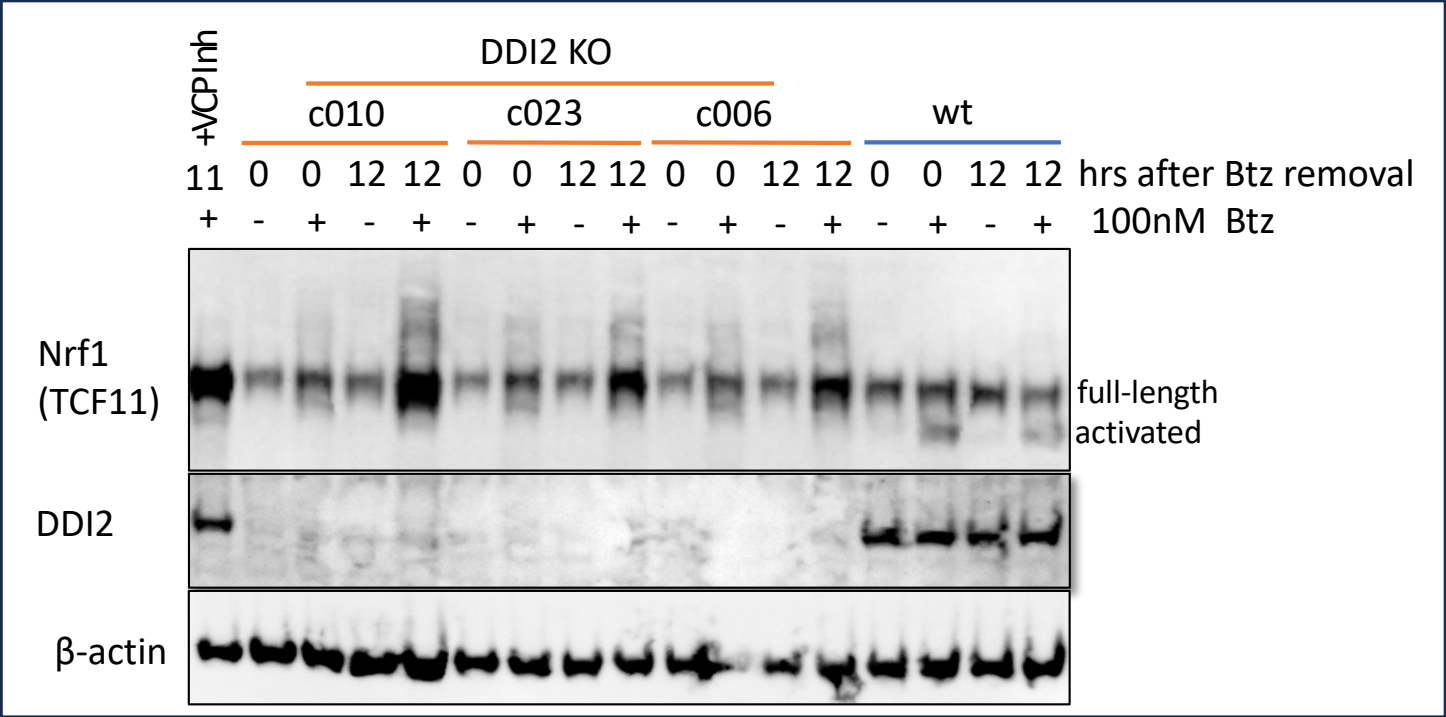

Nrf1 (TCF11)

DDI2 Ab after Nrf1 antibodies

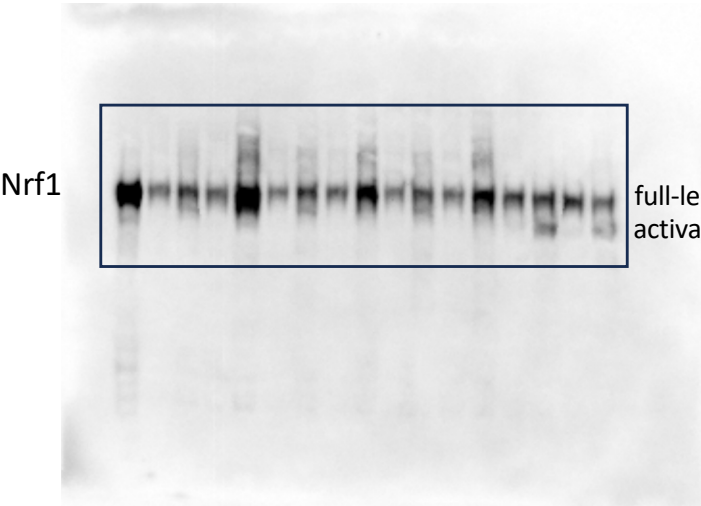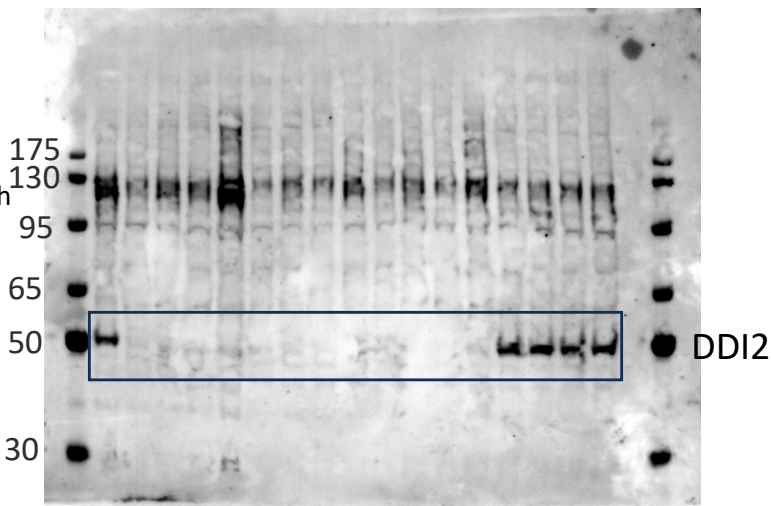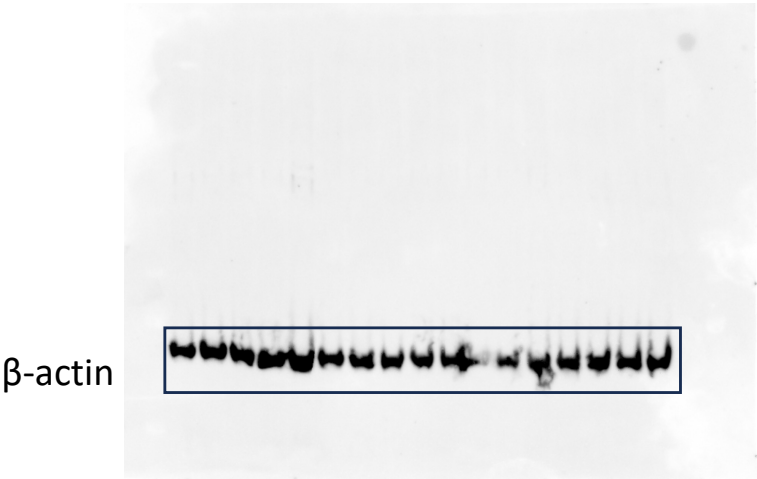

Supplement: fig1-data3 [file elife-91678-fig1-data3-v1.zip]

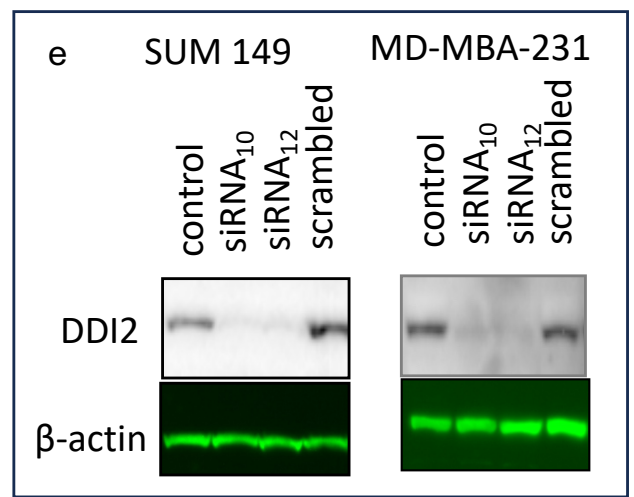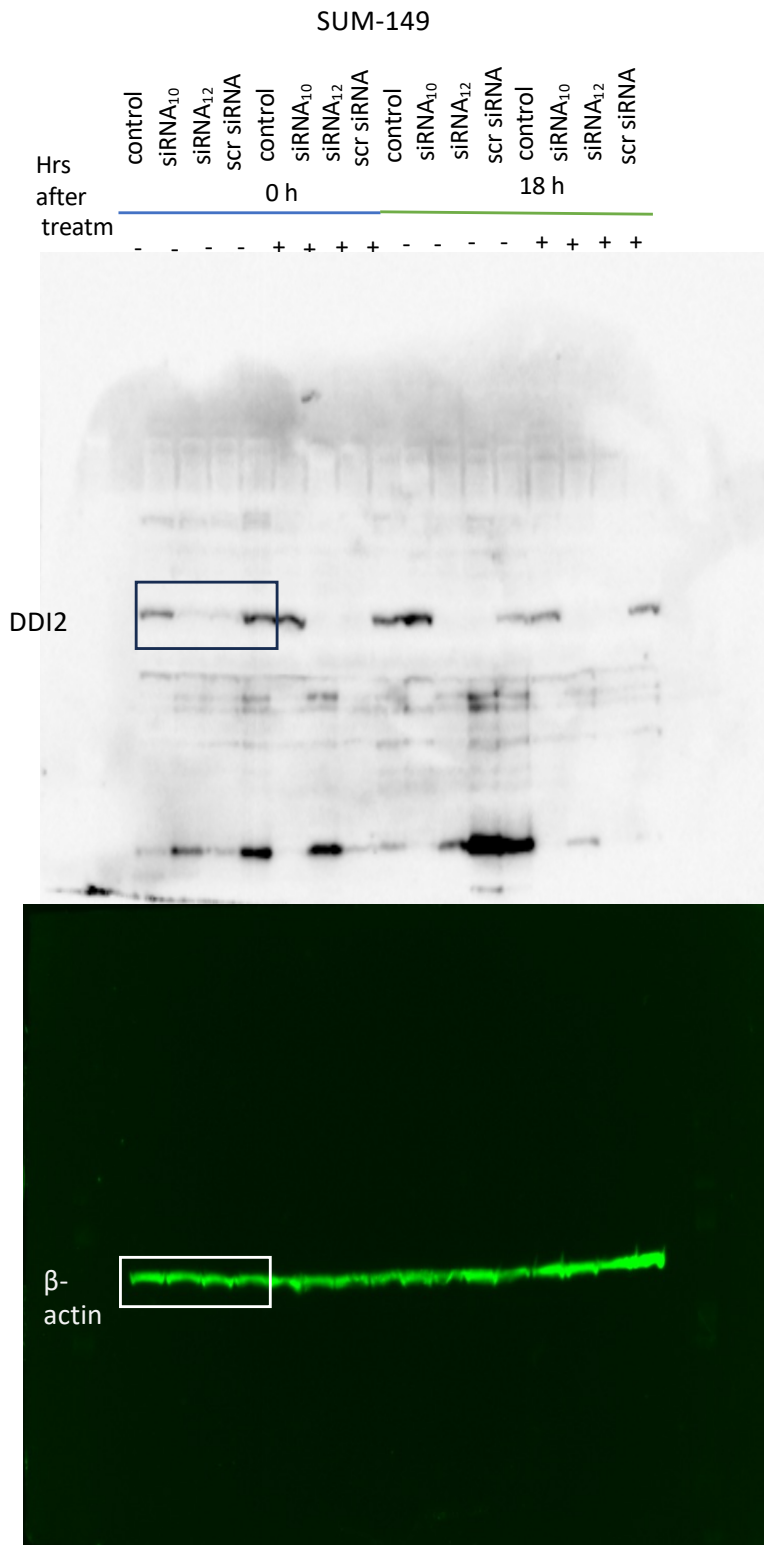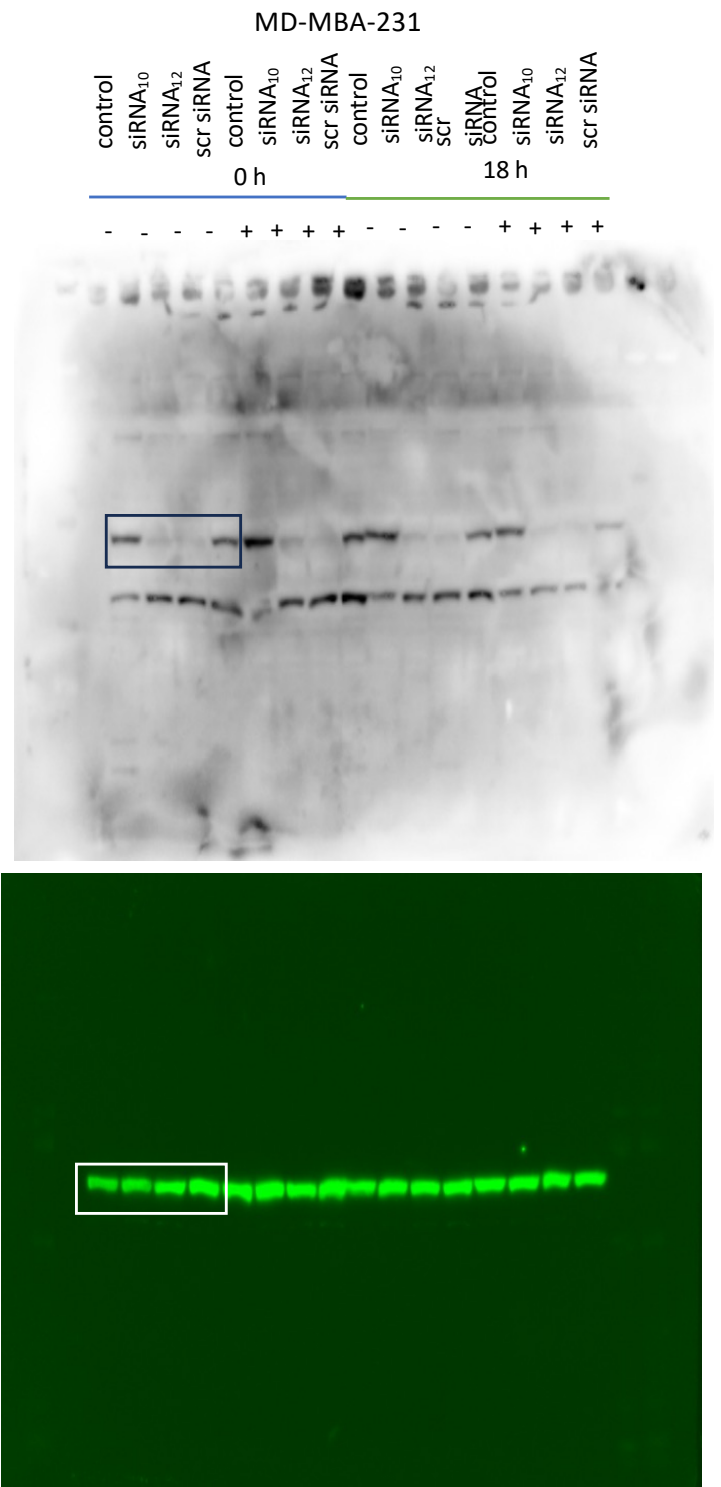

Supplement: fig1-data4 [file elife-91678-fig1-data4-v1.zip]
